# Supplementary material
Source: PubMed Central journal article supplement (PMC6581166)
Supplement: AEM.00037-19-s0001.pdf [file AEM.00037-19-s0001.pdf]

1 **Table S1: List of primers and control strains used in the PCR**

| Antimicrobial<br>resistance<br>factor | Gene                       | Primer                                                              | Amplicon<br>size (bp) | Control<br>strain     | Reference |
|---------------------------------------|----------------------------|---------------------------------------------------------------------|-----------------------|-----------------------|-----------|
| SHV-UP<br>SHV-LO                      | <i>bla<sub>SHV</sub></i>   | for CGCCGGGTTATTCTTATTTGTCGC<br>rev TCTTTCCGATGCCGCCGCCAGTCA        | 1016                  | PMON38                | (1, 2)    |
| TEM-G<br>TEM-H                        | <i>bla<sub>TEM</sub></i>   | for TTGCTCACCCAGAAACGCTGGTG<br>rev TACGATACGGGAGGGCTTACC            | 708                   | ECL3482 or<br>CTX-M15 | (1, 2)    |
| CTX-U1<br>CTX-U2                      | <i>bla<sub>CTX-M</sub></i> | for ATGTGCAGYACCAGTAARGTKATGGC<br>rev TGGGTRAARTARGTSACCAGAAYCAGCGG | 593                   | CTX-M15               | (1, 2)    |
| OXA1-F<br>OXA1-R                      | <i>bla<sub>OXA</sub></i>   | for CGCAAATGGCACCAGATTCAAC<br>rev TCCTGCACCAGTTTTCCCATACAG          | 464                   | CTX-M15               | (1, 2)    |
| CMY2-A<br>CMY2-B                      | <i>bla<sub>CMY</sub></i>   | for TGATGCAGGAGCAGGCTATTCC<br>rev CTAACGTCATCGGGGATCTGC             | 323                   | ECL3482               | (1, 2)    |
| uidA for<br>uidA rev                  | <i>uidA</i>                | for CCAAAAGCCAGACAGAGT<br>rev GCACAGCACATCAAAGAG                    | 623                   | ECL7805               | (3)       |

2

- 3 1. Mulvey MR, Grant JM, Plewes K, Roscoe D, Boyd DA. 2011. New Delhi metallo-beta-lactamase in *Klebsiella pneumoniae* and  
4 *Escherichia coli*, Canada. *Emerg Infect Dis* 17:103-6.
- 5 2. Sary K, Fairbrother JM, Arsenault J, de Lagarde M, Boulianne M. 2019. Antimicrobial Resistance and Virulence Gene Profiles Among  
6 *Escherichia coli* Isolates from Retail Chicken Carcasses in Vietnam. *Foodborne Pathog Dis* 16:298-306.
- 7 3. McDaniels AE, Rice EW, Reyes AL, Johnson CH, Haugland RA, Stelma GN, Jr. 1996. Confirmational identification of *Escherichia coli*, a  
8 comparison of genotypic and phenotypic assays for glutamate decarboxylase and beta-D-glucuronidase. *Appl Environ Microbiol* 62:3350-  
9 4.

10

11 **Table S2: List of antimicrobial disks used for Kirby Bauer assays**

| Antimicrobial disks           | Concentration<br>( $\mu\text{g}$ ) |
|-------------------------------|------------------------------------|
| Amoxicillin/Clavulanic acid   | 30                                 |
| Ampicillin                    | 10                                 |
| Azithromycin                  | 15                                 |
| Cefoxitin                     | 30                                 |
| Ceftiofur                     | 30                                 |
| Ceftriaxone                   | 30                                 |
| Chloramphenicol               | 30                                 |
| Ciprofloxacin                 | 5                                  |
| Gentamicin                    | 10                                 |
| Nalidixic acid                | 30                                 |
| Spectinomycin                 | 100                                |
| Streptomycin                  | 10                                 |
| Sulfisoxazole                 | 250                                |
| Tetracycline                  | 30                                 |
| Trimethoprim–sulfamethoxazole | 23,75                              |

12

13 **Table S3. Proportion of *E. coli* isolates positive for *bla*<sub>SHV</sub> before and after cessation of *in ovo* administration of ceftiofur and following its**  
 14 **substitution with lincomycin-spectinomycin in indicator and potential ESBL/AmpC-producer collections from newly hatched, broiler and**  
 15 **breeder birds from Canada**

| Sample origin                    | Before or after ceftiofur cessation in broiler | <i>In ovo</i> administration of: | No of isolates tested in indicator collection | No of isolates positive for <i>bla</i> <sub>SHV</sub> | No of isolates tested in ceftriaxone-enriched collection | No isolates positive for <i>bla</i> <sub>SHV</sub> |
|----------------------------------|------------------------------------------------|----------------------------------|-----------------------------------------------|-------------------------------------------------------|----------------------------------------------------------|----------------------------------------------------|
| Meconium of newly hatched chicks | Before (2014)                                  | Ceftiofur                        | 96                                            | 0                                                     | 57                                                       | 0                                                  |
|                                  | After (2015)                                   | Nothing                          | 69                                            | 0                                                     | 40                                                       | 0                                                  |
|                                  | After (2015)                                   | Lincomycin Spectinomycin         | 80                                            | 0                                                     | 47                                                       | 0                                                  |
| Pooled feces of broilers         | Before (2014)                                  | Ceftiofur                        | 100                                           | 2                                                     | 60                                                       | 0                                                  |
|                                  | After (2015)                                   | Nothing                          | 70                                            | 0                                                     | 42                                                       | 0                                                  |
|                                  | After (2015)                                   | Lincomycin Spectinomycin         | 79                                            | 0                                                     | 48                                                       | 1                                                  |
| Pooled feces of breeders         | Before (2014)                                  | Ceftiofur                        | 109                                           | 1                                                     | 66                                                       | 0                                                  |
|                                  | Before (2015)                                  | Ceftiofur                        | 119                                           | 0                                                     | 72                                                       | 1                                                  |

16

17

18 **Table S4. Percentage of multidrug resistance <sup>a</sup> by antimicrobial class <sup>b</sup> and antimicrobials <sup>c</sup> in all the potential ESBL/AmpC-producing**  
 19 **isolate collection in association with resistance gene combination**

| Combination of β-lactamase                                  | No of isolates | FLQ |     | CPS  |      | MAC  | PEN | PEN/I             | AMG  |      |      | CPM               | FOL  |                   | PHE             | TET               |
|-------------------------------------------------------------|----------------|-----|-----|------|------|------|-----|-------------------|------|------|------|-------------------|------|-------------------|-----------------|-------------------|
|                                                             |                | NA  | CIP | TIO  | CRO  | AZM  | AMP | AMC               | GEN  | SPT  | STR  | FOX               | SXT  | SSS               | CHL             | TET               |
| <i>bla</i> <sub>CMY-2</sub> only                            | 269            | 3,3 | 0,4 | 98,1 | 98,1 | 2,23 | 100 | 98,9 <sup>d</sup> | 43,1 | 32,3 | 68,8 | 98,9 <sup>d</sup> | 19,7 | 60,2 <sup>d</sup> | 19,3            | 59,4 <sup>d</sup> |
| <i>bla</i> <sub>CTX-M</sub> only                            | 15             | 0   | 0   | 100  | 100  | 0    | 100 | 26,7 <sup>e</sup> | 20   | 13,3 | 73,3 | 13,3 <sup>e</sup> | 33,3 | 86,7 <sup>e</sup> | 0 <sup>d</sup>  | 100 <sup>e</sup>  |
| <i>bla</i> <sub>CMY-2</sub> and <i>bla</i> <sub>CTX-M</sub> | 5              | 0   | 0   | 100  | 100  | 0    | 100 | 100 <sup>d</sup>  | 60   | 60   | 100  | 100 <sup>d</sup>  | 40   | 80                | 40 <sup>e</sup> | 80                |

20 <sup>a</sup> Tested by Kirby Bauer

21 <sup>b</sup> Antimicrobial class: (FLQ) Fluoroquinolones; (CPS) Cephalosporines; (MAC) Macrolides; (PEN) Penicillins; (PEN/I) Penicillins+ β-Lactamases  
 22 inhibitors; (AMG) Aminoglycosides; (CPM) Cephamycins; (FOL) Folate inhibitors; (PHE) Phenicol; (TET) Tetracyclines.

23 <sup>c</sup> Antimicrobials: (NA) Nalidixic acid; (CIP) Ciprofloxacin; (TIO) Ceftiofur; (CRO) Ceftriaxone; (AZM) Azithromycin; (AMP) Ampicillin;  
 24 (AMC) Amoxicillin/clavulanic acid; (GEN) Gentamicin; (SPT) Spectinomycin; (STR) Streptomycin; (FOX) Cefoxitin; (SXT) Trimethoprim-  
 25 sulphamethoxazole; (SSS) Sulfisoxazole; (CHL) Chloramphenicol; (TET) Tetracycline.

26 <sup>de</sup> Letters c and d in superscript in the same column of antimicrobial indicate significantly different results

27

28 **Table S5: Effect of ceftiofur cessation and the substitution with lincomycin-spectinomycin on the proportion of antimicrobial <sup>a</sup> phenotypic**  
 29 **co-resistance profiles in samples from newly hatched, broiler and breeder birds with *E. coli* of the ceftriaxone enriched collection**

| Phenotypic combinations                                                 | Administration <i>in ovo</i> of: |                 |                     |                  |                 |                     |                          |                     |
|-------------------------------------------------------------------------|----------------------------------|-----------------|---------------------|------------------|-----------------|---------------------|--------------------------|---------------------|
|                                                                         | Ceftiofur                        |                 |                     | No antimicrobial |                 |                     | Lincomycin spectinomycin |                     |
|                                                                         | 2014                             |                 | 2015                | 2015             |                 | 2015                |                          |                     |
|                                                                         | Breeder (n=22)                   | Meconium (n=22) | Broiler feces(n=22) | Breeder (n=24)   | Meconium (n=14) | Broiler feces(n=14) | Meconium (n=16)          | Broiler feces(n=16) |
| (TIO CRO) <sup>b</sup> AMP AMC FOX                                      | 4                                | 4               |                     | 3                | 1               | 2                   |                          |                     |
| (TIO CRO) AM AMC FOX SSS                                                |                                  | 1               |                     |                  | 2               | 2                   |                          |                     |
| Other combinations <sup>c</sup> with 6 antimicrobial n-sus <sup>d</sup> |                                  | 1               | 1                   | 3                |                 |                     |                          |                     |
| (TIO CRO) AMP AMC STR FOX TET                                           | 7                                | 1               | 1                   | 3                | 1               |                     |                          |                     |
| Other combinations with 7 antimicrobial n-sus                           | 1                                | 1               | 2                   |                  | 1               |                     |                          |                     |
| (TIO CRO) AMP AMC STR FOX SSS TET                                       | 1                                | 1               |                     |                  |                 |                     |                          |                     |
| Other combinations with 8 antimicrobial n-sus                           |                                  |                 | 1                   | 3                |                 | 1                   | 1                        | 2                   |
| (TIO CRO) AMP AMC STR FOX (SXT SSS) TET                                 |                                  | 1               | 4                   | 2                | 1               |                     | 2                        |                     |
| Other combinations with 9 antimicrobial n-sus                           |                                  |                 | 5                   | 1                | 2               | 2                   | 1                        |                     |
| (TIO CRO) AMP AMC (GEN STR) FOX SSS CHL TET                             |                                  | 1               |                     |                  | 1               | 1                   |                          |                     |
| (TIO CRO) AMP AMC (GEN SPT STR) FOX SSS TET                             | 2                                | 5               |                     | 3                | 2               | 4                   | 3                        | 2                   |
| Other combinations with 10 antimicrobial n-sus                          |                                  | 1               | 1                   | 1                |                 | 1                   |                          | 3                   |
| (TIO CRO) AMP AMC (GEN SPT STR) FOX SSS CHL TET                         | 3                                | 2               |                     | 4                |                 |                     | 4                        | 2                   |
| (TIO CRO) AMP AMC (GEN STR) FOX (SXT SSS) TET SPT                       |                                  |                 |                     |                  |                 |                     | 2                        | 2                   |
| Other combinations, 11 antimicrobial n-sus                              | 2                                |                 | 1                   |                  |                 | 1                   | 1                        | 1                   |
| (TIO CRO) AMP AMC (GEN SPT STR) FOX (SXT SSS) CHL TET                   |                                  |                 | 1                   | 1                | 3               |                     | 2                        | 4                   |
| Other combinations with 12 antimicrobial n-sus                          | 2                                |                 | 1                   |                  |                 |                     |                          |                     |
| Other combinations with 13-14 antimicrobial n-sus                       |                                  |                 | 2                   |                  |                 |                     |                          |                     |

30 <sup>a</sup> Antimicrobials: (NA) Nalidixic acid; (CIP) Ciprofloxacin; (TIO) Ceftiofur; (CRO) Ceftriaxone; (AZM) Azithromycin; (AMP) Ampicillin;  
 31 (AMC) Amoxicillin/clavulanic acid; (GEN) Gentamicin; (SPT) Spectinomycin; (STR) Streptomycin; (FOX) Cefoxitin; (SXT) Trimethoprim-  
 32 sulphamethoxazole; (SSS) Sulfisoxazole; (CHL) Chloramphenicol; (TET) Tetracycline.

- 33 <sup>b</sup> Antimicrobials in the same parentheses are from the same antimicrobial class.
- 34 <sup>c</sup> Other combinations are combinations which did not repeat or are less common.
- 35 <sup>d</sup> n-sus: non-susceptibility.
